# Supplementary material for: Adolescents’ Perspectives on the Barriers and Facilitators of Physical Activity: An Updated Systematic Review of Qualitative Studies
Source: MDPI journal article supplement (doi:10.3390/ijerph18094954), 2021-05-06
Supplement: s1 [file s1]

## Supplementary material

**Table S2.** Aims and theoretical frameworks of the studies included in the review

| Author (Year) [Study ref.]   | Aims (author's own words)                                                                                                                                                                                                                              | Theoretical framework                                      |
|------------------------------|--------------------------------------------------------------------------------------------------------------------------------------------------------------------------------------------------------------------------------------------------------|------------------------------------------------------------|
| Martins (2020) [27]          | To explore the experiences and perspectives of physically active and inactive adolescents regarding the influence of their friends on their PA throughout childhood and adolescence                                                                    | Social-ecological model of health                          |
| Casey (2016) [29]            | To explore the discourses and power relations operative between groups of girls that appeared to influence their participation in PE and outside of school in sport and PA in rural and regional communities                                           | Foucault's techniques of power                             |
| Garcia (2016) [30]           | To determine the association between adolescent MVPA and screen time with their nominated friends' behaviors and explore potential mechanisms of friends' social influences on MVPA and screen time                                                    | Not reported                                               |
| Hill (2015) [31]             | To share girls' perspectives on how the discourses of femininity and body in PE affected their gender performances and activity engagement                                                                                                             | Not reported                                               |
| Laird (2018) [32]            | To identify how girls perceive different sources and types of support to influence their PA, and to develop a grounded theory of how social support influences PA in adolescent girls                                                                  | Social support                                             |
| Van Hecke (2016) [33]        | To determine which social and physical environmental factors affect adolescents' visitation and PA in POS in low-income neighborhoods                                                                                                                  | Social-ecological model of health                          |
| Gavin (2016) [34]            | To explore adolescents' perceptions of psychosocial factors influencing their prolonged involvement in sports and PA                                                                                                                                   | Social cognitive theory and health action process approach |
| Beltrán-Carrillo (2018) [35] | To analyze how socio-cultural discourses about the body influenced adolescents' participation in PA                                                                                                                                                    | Body discourses and embodied identities                    |
| Martins (2018) [36]          | To explore and analyse the perspectives of physically active and inactive adolescent boys and girls with different socioeconomic status, regarding the meanings that PE had on their physical activity lifestyles throughout childhood and adolescence | Socio-ecological model for PE                              |
| Owen (2019) [37]             | To explore adolescent girls' perceptions and experiences of school-based PA to inform a subsequent intervention, the Girls Peer Activity project                                                                                                       | Not reported                                               |
| Knowles (2014) [38]          | Understand the decrease in PA behavior in adolescent girls during the transition from primary to secondary school in relation to their socio-cultural and embodied/physical experiences                                                                | Not reported                                               |
| Otero (2020) [39]            | To describe the perception of adolescents about the facilitators and barriers that influence PA                                                                                                                                                        | Not reported                                               |
| Palmer-Keenan (2019) [40]    | To ascertain inactive teens' insights regarding the types of physical activities they would be willing to do, and to inform a education - PA social marketing campaign targeting this audience                                                         | Not reported                                               |
| Baheiraei (2016) [41]        | To explain adolescents' insufficient PA and its related factors                                                                                                                                                                                        | Not reported                                               |
| Harris (2018) [42]           | To explore young people's knowledge and understanding of health, fitness and PA                                                                                                                                                                        | Not reported                                               |
| Kinsman (2015) [43]          | To identify and describe facilitating factors and barriers that are associated with PA among adolescent girls in rural, north-eastern South Africa, and to develop a model for promoting leisure-time PA within this population                        | Cultural competence and social identity theory             |

|                          |                                                                                                                                                                |                                                                      |
|--------------------------|----------------------------------------------------------------------------------------------------------------------------------------------------------------|----------------------------------------------------------------------|
| Rajaraman (2015) [44]    | To understand perceived benefits, facilitators, disadvantages, and barriers for physical activity among South Asian adolescents in India and Canada            | Not reported                                                         |
| Stride (2014) [45]       | To explore what South Asian Muslim girls have to say about school-based PE and how this relates to their involvement in PA away from school                    | Hill Collins' matrix of domination and intersectionality             |
| Stride (2016) [46]       | To explore the kinds of settings in which girls undertake PE and PA, and how these spaces influence experience                                                 | Hill Collins' matrix of domination and intersectionality             |
| Stride (2017) [47]       | To understand and explore South Asian Muslim young women's experiences of PA and how these are influenced by family                                            | Hill Collins' matrix of domination and intersectionality             |
| Stride (2018) [48]       | To explore the PA experiences in and around home of South Asian, Muslim young women                                                                            | Hill Collins' matrix of domination and intersectionality             |
| Devís-Devís (2015) [49]  | To explore the socio-ecological factors and their interplay that emerge from a qualitative study and influence adolescents' PA and sport participation         | Social-ecological model of health                                    |
| Hannus (2017) [50]       | To explore the factors that perceivably affect students' recess PA                                                                                             | Theory of planned behavior and the social-ecological model of health |
| Hidding (2018) [51]      | To explore adolescents' perspectives on characteristics of an activity-friendly environment through concept mapping (N.R.)                                     | Not reported                                                         |
| James (2018) [52]        | To explore the recommendations made by teenagers to improve activity provision, uptake and sustainability of PA engagement for both themselves and their peers | Not reported                                                         |
| Fernandez-Prieto [53]    | (2019) To identify adolescents' perceived barriers and motivations to regular PA practice, and how they form the concept of PA through thought and action      | Not reported                                                         |
| Fernandez-Prieto [54]    | (2019) To explore the topics related to PA of a group of adolescents and to identify the barriers and motivators of regular PA practice                        | Not reported                                                         |
| Borhani (2017) [55]      | To explore teenage girls' experiences regarding the determinants of PA promotion                                                                               | Pender's Health Promotion Model                                      |
| Abdelghaffar (2019) [56] | To explore potential social-ecological barriers and facilitators of PA in Moroccan adolescents                                                                 | Social-ecological model of health                                    |
| Payán (2019) [57]        | To understand perceived barriers and facilitators to PA among at-risk African American and Hispanic adolescents and adults in a low-income community           | Social-ecological model of health                                    |
