# Supplementary material for: Adolescents’ Perspectives on the Barriers and Facilitators of Physical Activity: An Updated Systematic Review of Qualitative Studies
Source: Int J Environ Res Public Health. 2021 May 6;18(9):4954. doi: 10.3390/ijerph18094954 (PMC8125166; doi:10.3390/ijerph18094954)
Supplement: Supplementary file 1 [file ijerph-18-04954-s001.zip]

Archive with 4 entries (4 files):
- __MACOSX/._supplementary material_S1_proofreaded.docx
- __MACOSX/._supplementary material_S2_proofreaded.docx
- supplementary material_S1_proofreaded.pdf
- supplementary material_S2_proofreaded.pdf
